# Supplementary material for: Rational Design of Recombinant Papain-Like Cysteine Protease: Optimal Domain Structure and Expression Conditions for Wheat-Derived Enzyme Triticain-α
Source: PubMed Central journal article supplement (PMC5535888; doi:10.3390/ijms18071395), 2017-06-29
Supplement: ijms-18-01395-s001.pdf [file ijms-18-01395-s001.pdf]

## Supplementary Materials:

# Rational Design of Recombinant Papain-Like Cysteine Protease: Optimal Domain Structure and Expression Conditions for Wheat-Derived Enzyme Triticain- $\alpha$

Neonila V. Gorokhovets, Vladimir A. Makarov, Anastasiia I. Petushkova, Olga S. Prokopets, Mikhail A. Rubtsov, Lyudmila V. Savvateeva, Evgeni Yu. Zernii and Andrey A. Zamyatnin Jr.

Table S1. Oligonucleotides used for cloning of Triticain- $\alpha$  expression vectors.

| Construct                                                            | Oligonucleotide (Forward/Reverse)*                                                                                                |
|----------------------------------------------------------------------|-----------------------------------------------------------------------------------------------------------------------------------|
| pET26-Triticain- $\alpha$ -GM                                        | 5'-TATACATATGTCGATCGTGTCTCGTACGG/<br>5'-TATTAAGCTTTTAGCCCGTCTTCGTCCGG                                                             |
| pET28-6HIS-Triticain- $\alpha$ -GM                                   | 5'-TATACATATGTCGATCGTGTCTCGTACGG/<br>5'-TATTAAGCTTTTAGCCCGTCTTCGTCCGG                                                             |
| pET28-Triticain- $\alpha$ -GM-6HIS                                   | 5'-TATACCATGGCGGACATGTCGATCGTGTCTCG/<br>5'-TATTCGAGGCCCGTCTTCGTCCGGTAG                                                            |
| pET26-pelB-Triticain- $\alpha$ -GM-6HIS                              | 5'-TATACCATGGCGGACATGTCGATCGTGTCTCG/<br>5'-TATTCGAGGCCCGTCTTCGTCCGGTAG                                                            |
| pQE80-6HIS-Triticain- $\alpha$ -CatD                                 | 5'-TGGATCCCTGCCGGAGACCGTCCG/<br>5'-TATTAAGCTTTTAGCCCGTCTTCGTCCGG                                                                  |
| pET28-6HIS-Triticain- $\alpha$ -CatD                                 | 5'-TATCATATGCTGCCGGAGACCGTCCG/<br>5'-TATTAAGCTTTTAGCCCGTCTTCGTCCGG                                                                |
| pET26-Triticain- $\alpha$ -CatD                                      | 5'-TATCATATGCTGCCGGAGACCGTCCG/<br>5'-TATTAAGCTTTTAGCCCGTCTTCGTCCGG                                                                |
| pQE80-6HIS-Triticain- $\alpha$ -ProD                                 | 5'-ATGGATCCATCGTGTCTGACGGGGAG/<br>5'-TATTAAGCTTTACTCCTCGTTGTCGTCG                                                                 |
| pET30-Triticain- $\alpha$ -CatD-6HIS                                 | 5'-TATCATATGCTGCCGGAGACCGTCCG/<br>5'-TTCGAGGCCCGTCTTCGTCCGGT                                                                      |
| pGEX-GST-Triticain- $\alpha$ -CatD                                   | 5'-ATGGATCCCTGCCGGAGACCGTCCGAC/<br>5'-TTCGAGTTAGCCCGTCTTCGTCCGG                                                                   |
| pET15-6HIS-Triticain- $\alpha$ -GM                                   | 5'-TATACATATGTCGATCGTGTCTCGTACGG/<br>5'-TTCGAGTTAGCCCGTCTTCGTCCGG                                                                 |
| pET15-Triticain- $\alpha$ -CatD -6HIS                                | 5'-ATACCATGGCGCTGCCGGAGACCGTCCG/<br>5'-ATTTCGAGTCACTGGTGGTGGTGGTGGCCCGTCTTCGTCCGGT                                                |
| pET15-Triticain- $\alpha$ -GM-6HIS                                   | 5'-TATACCATGGCGGACATGTCGATCGTGTCTCG/<br>5'-ATTTCGAGTCACTGGTGGTGGTGGTGGTGGCCCGTCTTCGTCCGGT                                         |
| pPIC9-Triticain- $\alpha$ -GM                                        | 5'-TGAATTCATCCATCGTGTCTCGTACGGG/<br>5'-ATTCGGGCCGCTTAGCCCGTCTTCGTCCGG                                                             |
| pPIC9K-Triticain- $\alpha$ -G                                        | 5'-TGAATTCATCCATCGTGTCTCGTACGGG/<br>5'-ATTCGGGCCGCTTAGCCCGTCTTCGTCCGG                                                             |
|                                                                      | <i>Mutagenic Megaprimer:</i>                                                                                                      |
| pET15-6HIS-extP-Triticain- $\alpha$ -CatD                            | 5'-GCCGGAGACCGTCCGATTGGAGGAAGAAGG<br>5'-TTACATATGAATTATGAAGAAGTTATAAAAAAATATAGAGG/<br>5'-ATTCATATGGAAATTTTCTTCTCCTCTATATTTTTTATAA |
| pET15-6HIS-extP-Triticain- $\alpha$ -CatD <sup>C154A</sup>           | 5'-TTACATATGAATTATGAAGAAGTTATAAAAAAATATAGAGG/<br>5'-ATTCATATGGAAATTTTCTTCTCCTCTATATTTTTTATAA                                      |
| pET15[6HIS-Triticain- $\alpha$ -CatD+6HIS-Triticain- $\alpha$ -ProD] | 5'-ATAAGATCTAAATCATAAAAAAATTTATTGTC/<br>5'-ATAAGATCTATTCTCACCAATAAAAAAACG                                                         |

\* Restriction sites are underlined
